# Supplementary material for: Dopamine based adhesive nano-coatings on extracellular matrix (ECM) based grafts for enhanced host–graft interfacing affinity
Source: Royal Society of Chemistry journal article supplement (doi:10.1039/d1nr06284k), 2021-01-01
Supplement: d1nr06284k1.pdf [file d1nr06284k1.pdf]

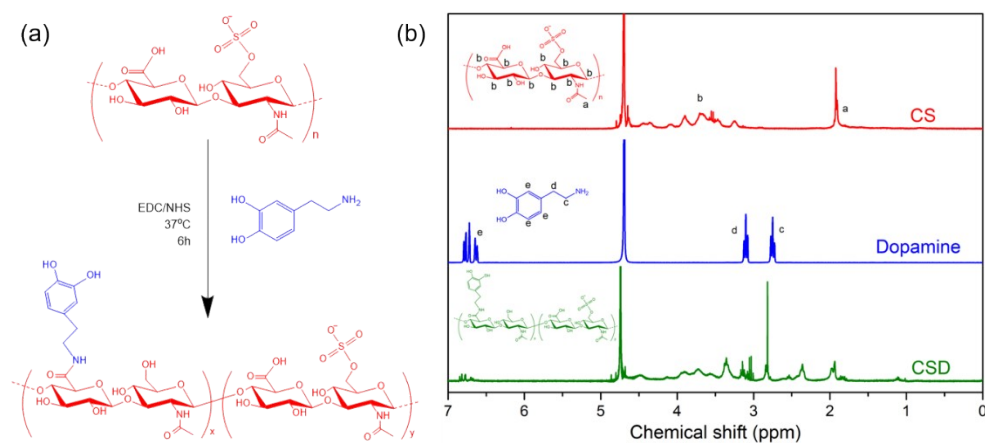

Figure S1 (a) Synthesis of CSD, (b)  $^1\text{H}$  NMR spectra of CS, dopamine and CSD, respectively.

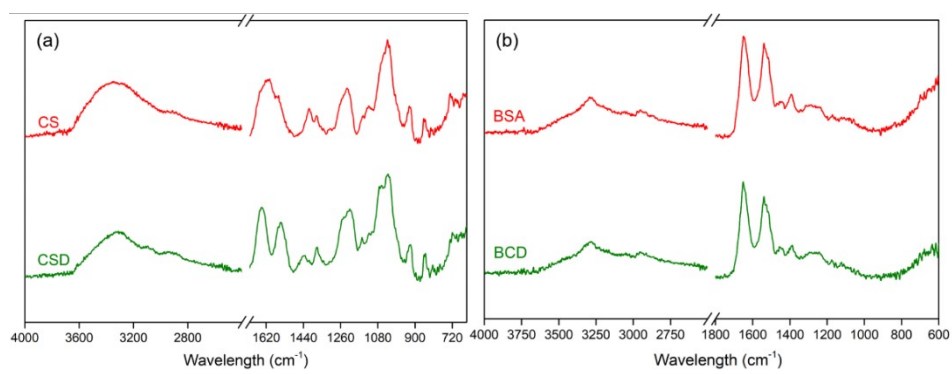

Figure S2 ATR-FTIR spectra of (a) CS, CSD and (b) BSA, BCD, respectively.

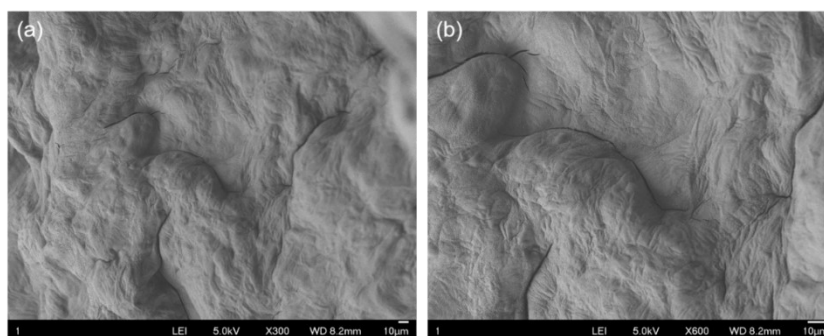

Figure S3 SEM images of TISSEEL-dLhCG under (a)  $\times 300$  and (b)  $\times 600$  magnification, respectively.

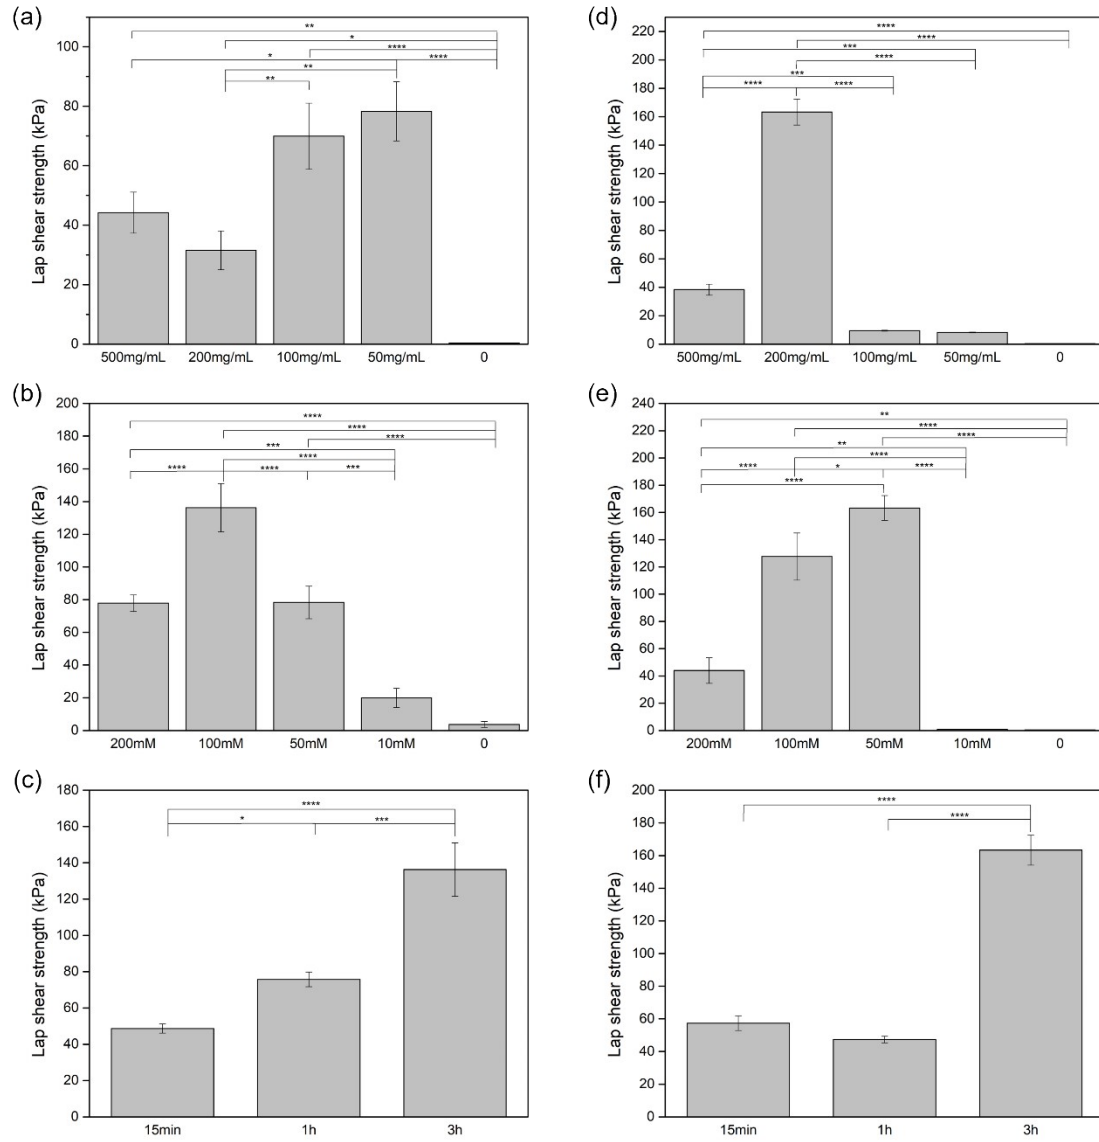

Figure S4 Lap shear strength between two slices of cartilage glued by BCD adhesive with different (a) BCD concentration, (b)  $\text{Fe}^{3+}$  concentration and (c) incubation time or CSD adhesive with different (d) CSD concentration, (e)  $\text{Fe}^{3+}$  concentration and (f) incubation time (\* $p < 0.05$ , \*\* $p < 0.01$ , \*\*\* $p < 0.001$ , \*\*\*\* $p < 0.0001$ ).
